# Supplementary material for: DiscoverY: a classifier for identifying Y chromosome sequences in male assemblies
Source: PubMed Central journal article supplement (PMC6688218; doi:10.1186/s12864-019-5996-3), 2019-08-09
Supplement: 12864_2019_5996_MOESM1_ESM.pdf [file 12864_2019_5996_MOESM1_ESM.pdf]

# Supplementary Material

*DiscoverY: A classifier for identifying Y chromosome sequences in male assemblies*

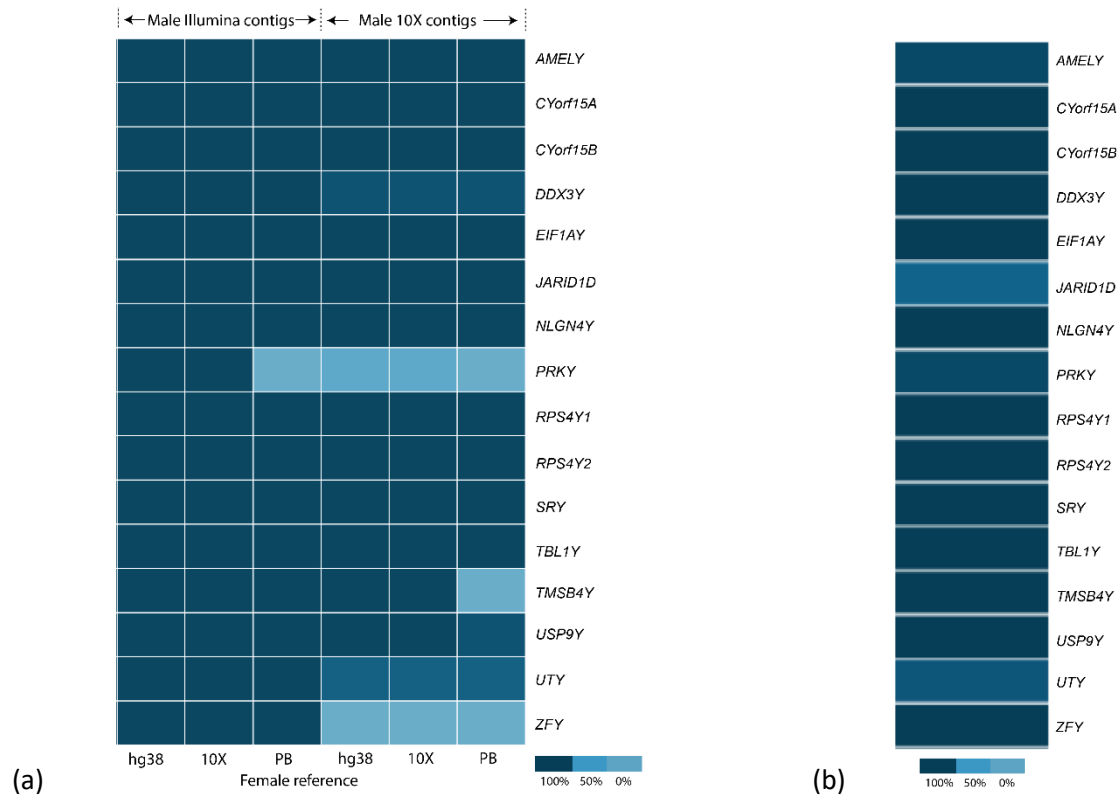

**Figure S1. Retrieval of X-degenerate genes. (a)** To check for the retrieval of X-degenerate genes by DiscoverY assemblies, sequences of 16 single copy human X-degenerate genes were mapped to the assemblies using BWA mem (version 0.7.5a-r428) [1] with seed length = 5 to increase sensitivity. The percentage in the heat map is the length of the gene sequence mapping to the assembly. The assemblies shown in the left heatmap are for the human Illumina male using the female reference as hg38 (column 1), 10X (column 2), and PacBio (column 3). **(b)** The right panel shows the heatmap for the gorilla contigs

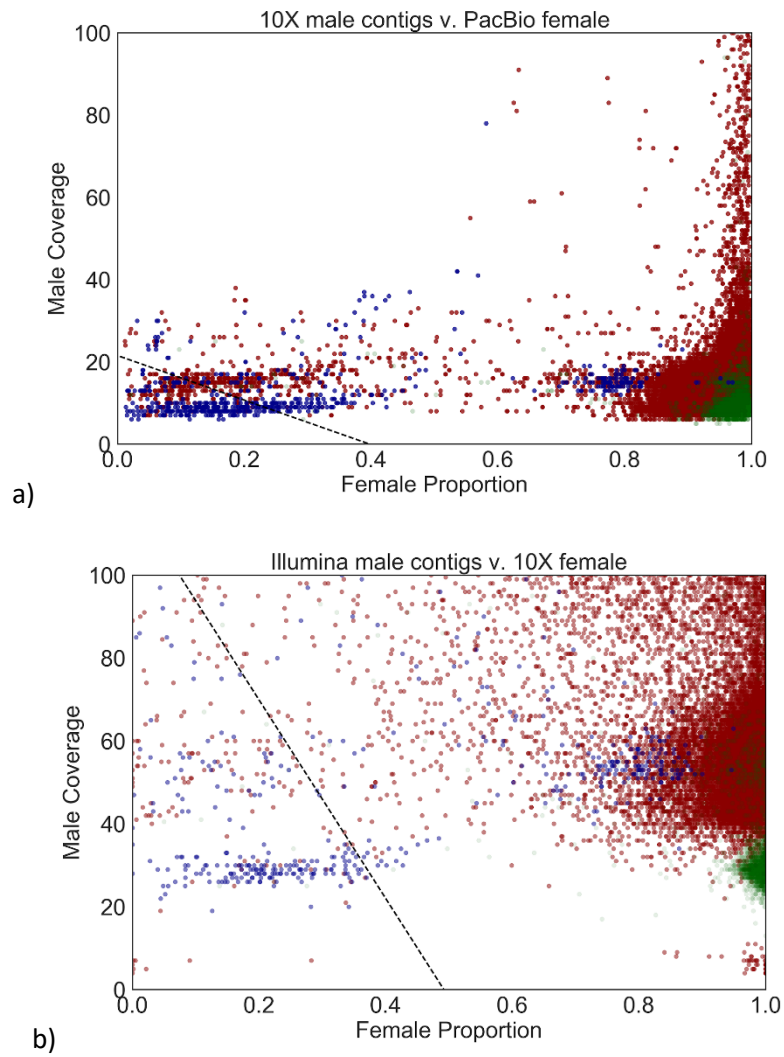

**Figure S2. Scatter plot for the 10X male and PacBio female run (panel a) and the Illumina male and 10X female run (panel b).** Y-chromosomal contigs are represented in blue, autosomal contigs in red, and X-chromosomal contigs in green.

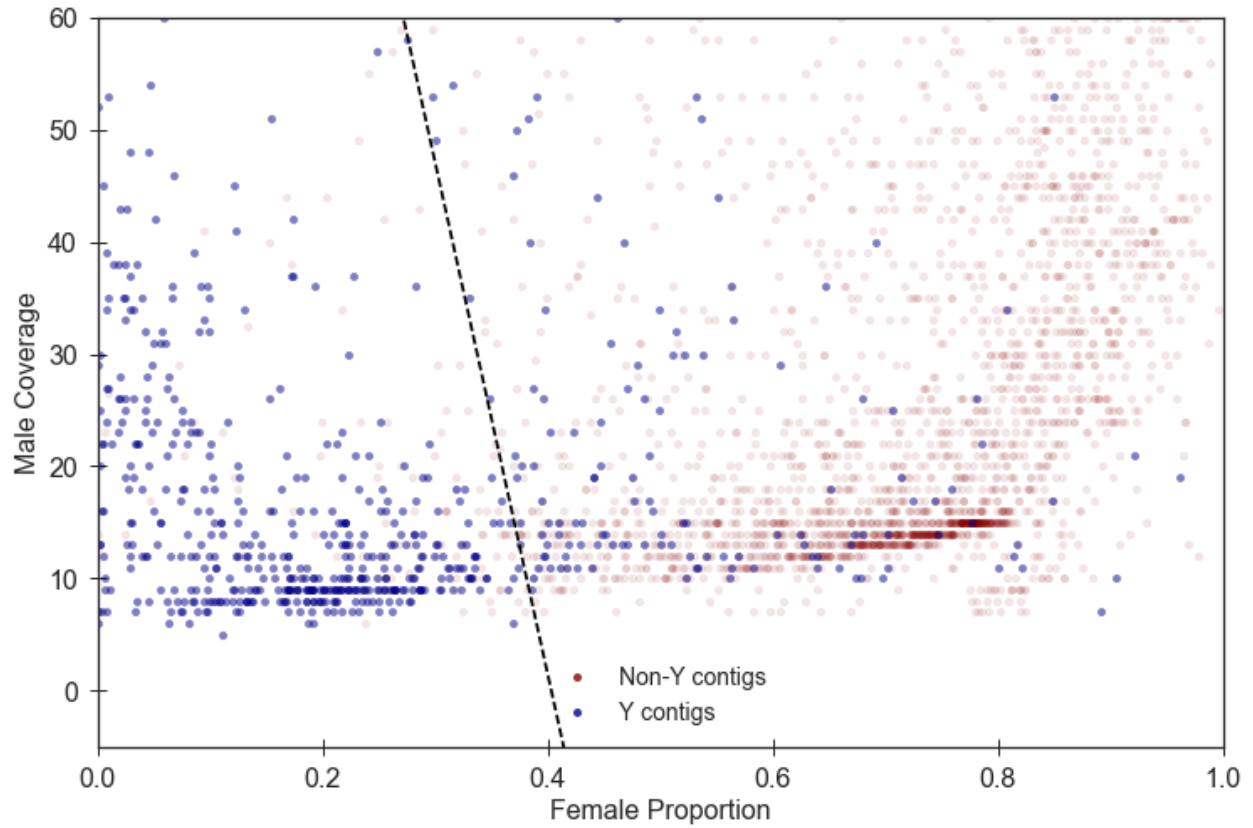

**Figure S3. Gorilla contigs plotted with female proportion and male coverage.** Among the Y chromosomal contigs to the left, note a dense cluster at  $\sim 8x$  coverage. Since this is half the depth of coverage of autosomal contigs ( $\sim 16x$ ), these contigs are likely from single-copy regions on the Y chromosome.

**Table S1. Accession numbers of datasets used to test DiscoveryY.**

| Dataset |          |     |             | Accession                        | Accession         | Citation   |
|---------|----------|-----|-------------|----------------------------------|-------------------|------------|
| Org     | Tech     | Sex | Sample      | for Reads                        | for Contigs       |            |
| Human   | Illumina | M   | NA24385     | GIAB ftp site [2]<br>SRX1392293- | GIAB ftp site [3] | [4]        |
| Human   | 10X      | M   | NA24385     | SRX1392296<br>SRX1033793-        | GCA_002023025.1   | [5]        |
| Human   | PacBio   | M   | NA24385     | SRX1033798<br>SRX1049768-        | GCA_001542345.1   | [4], [6]   |
| Human   | Illumina | F   | NA12878     | SRX1049855                       | N/A               | [4]        |
| Human   | mixed    | F   | hg38        | N/A                              | GCA_000001405.15  | [7]        |
| Human   | 10X      | F   | NA12878     | N/A                              | GCA_002022845.1   | [5]        |
| Human   | PacBio   | F   | NA12878     | N/A<br>SRX6461472-               | GCA_001013985.1   | [8]        |
| Gorilla | Illumina | M   | see Methods | SRX6461474                       | N/A               | this paper |
| Gorilla | Illumina | F   | Gg6         | SRX6461471                       | N/A               | this paper |

**Table S2. Region-by-region breakdown of the human Y chromosome.** Note that some regions occur as a series of interspersed tracts.

| <b>Sequence class of Y</b>  | <b>Start coordinate on hg38 (Mb)</b> | <b>End coordinate on hg38 (Mb)</b> | <b>Total Length (Mb)</b> |
|-----------------------------|--------------------------------------|------------------------------------|--------------------------|
| <i>PAR (Total)</i>          | <i>N/A</i>                           | <i>N/A</i>                         | 4.0                      |
| PAR 1                       | 0                                    | 2.8                                | 2.8                      |
| PAR 2                       | 56.5                                 | 57.7                               | 1.2                      |
| <i>X-transposed (Total)</i> | 3.1                                  | 6.5                                | 3.4                      |
| <i>X-degenerate (Total)</i> | <i>N/A</i>                           | <i>N/A</i>                         | 10.5                     |
| X-degenerate (Tract 1)      | 2.8                                  | 3.1                                | 0.3                      |
| X-degenerate (Tract 2)      | 6.5                                  | 7.5                                | 1.0                      |
| X-degenerate (Tract 3)      | 10.6                                 | 15.8                               | 5.2                      |
| X-degenerate (Tract 4)      | 16.2                                 | 17.5                               | 1.3                      |
| X-degenerate (Tract 5)      | 18.8                                 | 21.5                               | 2.7                      |
| <i>Ampliconic (Total)</i>   | <i>N/A</i>                           | <i>N/A</i>                         | 10.0                     |
| Ampliconic (Tract 1)        | 7.5                                  | 10.3                               | 2.8                      |
| Ampliconic (Tract 2)        | 15.8                                 | 16.2                               | 0.4                      |
| Ampliconic (Tract 3)        | 17.5                                 | 18.8                               | 1.3                      |
| Ampliconic (Tract 3)        | 21.5                                 | 27.0                               | 5.5                      |
| <i>Centromere (Total)</i>   | 10.3                                 | 10.6                               | 0.3                      |

**Table S3. Accuracy of DiscoverY on different datasets (raw numbers for Figure 3).**

| Male Dataset           | Female data      | True Y by Mapping (Mb) | "Y" according to DiscoverY (Mb) | Precision | Recall | Female Proportion Threshold | Male Coverage Threshold |
|------------------------|------------------|------------------------|---------------------------------|-----------|--------|-----------------------------|-------------------------|
| Illumina               | hg38             | 17.58                  | 14.17                           | 99.86     | 80.51  | 0.58                        | 1186                    |
| Illumina               | 10X              | 17.58                  | 13.32                           | 94.36     | 71.49  | 0.49                        | 117                     |
| Illumina               | PacBio           | 17.58                  | 16.79                           | 63.27     | 60.43  | 0.35                        | 143                     |
| 10X                    | hg38             | 24.44                  | 19.98                           | 99.99     | 81.78  | 0.64                        | 484                     |
| 10X                    | 10X              | 24.44                  | 21.97                           | 89.56     | 80.52  | 0.54                        | 223                     |
| 10X                    | PacBio           | 24.44                  | 18.53                           | 62.11     | 47.1   | 0.39                        | 21                      |
| PacBio                 | hg38             | 18.09                  | 13.71                           | 99.91     | 75.74  | 0.51                        | 428                     |
| PacBio                 | 10X              | 18.09                  | 13.66                           | 96.98     | 73.24  | 0.5                         | 114                     |
| PacBio                 | PacBio           | 18.09                  | 13.44                           | 97.32     | 72.34  | 0.43                        | 109                     |
| gorGor 5.0 + gorY v1.0 | Gorilla Illumina | 25.35                  | 21.55                           | 92.68     | 78.81  | 0.4                         | 183                     |
|                        | Illum. reads at  |                        |                                 |           |        |                             |                         |
| Illumina               | 7.5x             | 17.58                  | 15.03                           | 89.64     | 76.65  | 0.38                        | 707                     |
|                        | Illum. reads at  |                        |                                 |           |        |                             |                         |
| Illumina               | 15x              | 17.58                  | 15.1                            | 92.76     | 79.67  | 0.49                        | 2792                    |
|                        | Illum. reads at  |                        |                                 |           |        |                             |                         |
| Illumina               | 30x              | 17.58                  | 14.78                           | 97.41     | 81.93  | 0.53                        | 1566                    |
|                        | Illum. reads at  |                        |                                 |           |        |                             |                         |
| Illumina               | 60x              | 17.58                  | 15.14                           | 97.11     | 83.65  | 0.57                        | 1306                    |
|                        | Illum. reads at  |                        |                                 |           |        |                             |                         |
| Illumina               | 120x             | 17.58                  | 14.89                           | 97.26     | 82.38  | 0.58                        | 3131                    |

**Table S4. Effect of parameters on DiscoverY (raw numbers used to generate Figure 5).** The male dataset used is Illumina. The runs used as points for the convex hull in Figure 5 are shown in bold.

| Female Data | Mode               | True Y by Mapping (Mb) | "Y" according to DiscoverY (Mb) | Precision    | Recall       | Female Proportion Threshold | Male Coverage Threshold |
|-------------|--------------------|------------------------|---------------------------------|--------------|--------------|-----------------------------|-------------------------|
| <b>hg38</b> | <b>female+male</b> | <b>17.58</b>           | <b>5.39</b>                     | <b>100</b>   | <b>30.7</b>  | <b>0.2</b>                  | <b>80</b>               |
| hg38        | female+male        | 17.58                  | 8.48                            | 100          | 48.23        | 0.3                         | 30                      |
| hg38        | female+male        | 17.58                  | 9.12                            | 100          | 51.89        | 0.3                         | 40                      |
| hg38        | female+male        | 17.58                  | 9.65                            | 100          | 54.93        | 0.3                         | 50                      |
| hg38        | female+male        | 17.58                  | 10.67                           | 100          | 60.68        | 0.3                         | 60                      |
| hg38        | female+male        | 17.58                  | 10.8                            | 100          | 61.42        | 0.3                         | 70                      |
| hg38        | female+male        | 17.58                  | 11.11                           | 100          | 63.22        | 0.3                         | 80                      |
| hg38        | female+male        | 17.58                  | 11.18                           | 100          | 63.59        | 0.3                         | 90                      |
| hg38        | female+male        | 17.58                  | 11.24                           | 100          | 63.96        | 0.3                         | 100                     |
| hg38        | female+male        | 17.58                  | 10.98                           | 100          | 62.49        | 0.4                         | 40                      |
| hg38        | female+male        | 17.58                  | 12.66                           | 100          | 72.05        | 0.4                         | 60                      |
| hg38        | female+male        | 17.58                  | 11.81                           | 99.97        | 67.19        | 0.5                         | 50                      |
| <b>hg38</b> | <b>female+male</b> | <b>17.58</b>           | <b>11.19</b>                    | <b>99.98</b> | <b>63.64</b> | <b>0.6</b>                  | <b>40</b>               |
| hg38        | female+male        | 17.58                  | 12.96                           | 99.88        | 73.63        | 0.6                         | 60                      |
| hg38        | female+male        | 17.58                  | 9.82                            | 99.97        | 55.85        | 0.7                         | 30                      |
| <b>hg38</b> | <b>female+male</b> | <b>17.58</b>           | <b>13.49</b>                    | <b>99.59</b> | <b>76.43</b> | <b>0.7</b>                  | <b>70</b>               |
| hg38        | female+male        | 17.58                  | 9.82                            | 99.92        | 55.85        | 0.8                         | 30                      |
| hg38        | female+male        | 17.58                  | 11.24                           | 99.53        | 63.65        | 0.8                         | 40                      |
| hg38        | female+male        | 17.58                  | 12.22                           | 98.13        | 68.23        | 0.8                         | 50                      |
| hg38        | female+male        | 17.58                  | 14.11                           | 97.75        | 78.5         | 0.8                         | 60                      |

|             |                         |              |              |              |              |            |            |
|-------------|-------------------------|--------------|--------------|--------------|--------------|------------|------------|
| hg38        | female+male             | 17.58        | 14.57        | 97.2         | 80.62        | 0.8        | 70         |
| hg38        | female+male             | 17.58        | 15.05        | 97.17        | 83.21        | 0.8        | 80         |
| hg38        | female+male             | 17.58        | 15.35        | 97.07        | 84.78        | 0.8        | 90         |
| <b>hg38</b> | <b>female+male</b>      | <b>17.58</b> | <b>15.5</b>  | <b>96.87</b> | <b>85.43</b> | <b>0.8</b> | <b>100</b> |
| hg38        | female+male             | 17.58        | 9.83         | 99.86        | 55.85        | 0.9        | 30         |
| hg38        | female+male             | 17.58        | 11.51        | 97.19        | 63.66        | 0.9        | 40         |
| hg38        | female+male             | 17.58        | 13.54        | 88.91        | 68.48        | 0.9        | 50         |
| hg38        | female+male             | 17.58        | 18.69        | 80.83        | 85.92        | 0.9        | 60         |
| hg38        | female+male             | 17.58        | 19.74        | 78.88        | 88.52        | 0.9        | 70         |
| hg38        | female+male             | 17.58        | 20.32        | 78.82        | 91.11        | 0.9        | 80         |
| hg38        | female+male             | 17.58        | 20.69        | 78.73        | 92.68        | 0.9        | 90         |
| <b>hg38</b> | <b>female+male</b>      | <b>17.58</b> | <b>20.99</b> | <b>78.15</b> | <b>93.33</b> | <b>0.9</b> | <b>100</b> |
| hg38        | best                    | 17.58        | 14.17        | 99.86        | 80.51        | auto       | auto       |
| <b>hg38</b> | <b>female_only(YGS)</b> | <b>17.58</b> | <b>5.83</b>  | <b>100</b>   | <b>33.16</b> | <b>0.2</b> | <b>n/a</b> |
| <b>hg38</b> | <b>female_only(YGS)</b> | <b>17.58</b> | <b>13.7</b>  | <b>100</b>   | <b>77.94</b> | <b>0.4</b> | <b>n/a</b> |
| <b>hg38</b> | <b>female_only(YGS)</b> | <b>17.58</b> | <b>14.75</b> | <b>99.22</b> | <b>83.26</b> | <b>0.6</b> | <b>n/a</b> |
| <b>hg38</b> | <b>female_only(YGS)</b> | <b>17.58</b> | <b>17.57</b> | <b>91.42</b> | <b>91.39</b> | <b>0.8</b> | <b>n/a</b> |
| <b>10X</b>  | <b>female+male</b>      | <b>17.58</b> | <b>5.86</b>  | <b>91.76</b> | <b>30.59</b> | <b>0.2</b> | <b>80</b>  |
| 10X         | female+male             | 17.58        | 8.51         | 97.8         | 47.39        | 0.3        | 30         |
| 10X         | female+male             | 17.58        | 9.3          | 96.46        | 51.04        | 0.3        | 40         |
| 10X         | female+male             | 17.58        | 9.98         | 95.25        | 54.09        | 0.3        | 50         |
| 10X         | female+male             | 17.58        | 11.19        | 94           | 59.84        | 0.3        | 60         |
| 10X         | female+male             | 17.58        | 11.37        | 93.67        | 60.58        | 0.3        | 70         |



|            |                    |              |              |              |              |            |           |
|------------|--------------------|--------------|--------------|--------------|--------------|------------|-----------|
| 10X        | female+male        | 17.58        | 11.69        | 93.73        | 62.37        | 0.3        | 80        |
| 10X        | female+male        | 17.58        | 11.8         | 93.45        | 62.75        | 0.3        | 90        |
| 10X        | female+male        | 17.58        | 11.9         | 93.2         | 63.12        | 0.3        | 100       |
| 10X        | female+male        | 17.58        | 11.4         | 96.31        | 62.49        | 0.4        | 40        |
| <b>10X</b> | <b>female+male</b> | <b>17.58</b> | <b>13.5</b>  | <b>93.86</b> | <b>72.08</b> | <b>0.4</b> | <b>60</b> |
| 10X        | female+male        | 17.58        | 12.48        | 94.64        | 67.19        | 0.5        | 50        |
| 10X        | female+male        | 17.58        | 11.71        | 95.51        | 63.64        | 0.6        | 40        |
| 10X        | female+male        | 17.58        | 14.13        | 91.55        | 73.6         | 0.6        | 60        |
| <b>10X</b> | <b>female+male</b> | <b>17.58</b> | <b>10.03</b> | <b>97.87</b> | <b>55.85</b> | <b>0.7</b> | <b>30</b> |
| 10X        | female+male        | 17.58        | 15.66        | 85.78        | 76.4         | 0.7        | 70        |
| 10X        | female+male        | 17.58        | 10.08        | 97.33        | 55.85        | 0.8        | 30        |
| 10X        | female+male        | 17.58        | 12.17        | 91.94        | 63.65        | 0.8        | 40        |
| 10X        | female+male        | 17.58        | 11.99        | 85.36        | 68.23        | 0.8        | 50        |
| 10X        | female+male        | 17.58        | 17.09        | 80.79        | 78.56        | 0.8        | 60        |
| 10X        | female+male        | 17.58        | 18.57        | 76.38        | 80.68        | 0.8        | 70        |
| 10X        | female+male        | 17.58        | 19.8         | 73.94        | 83.27        | 0.8        | 80        |
| <b>10X</b> | <b>female+male</b> | <b>17.58</b> | <b>20.94</b> | <b>71.22</b> | <b>84.84</b> | <b>0.8</b> | <b>90</b> |
| 10X        | female+male        | 17.58        | 22.79        | 65.94        | 85.49        | 0.8        | 100       |
| 10X        | female+male        | 17.58        | 10.28        | 95.47        | 55.85        | 0.9        | 30        |
| 10X        | female+male        | 17.58        | 12.96        | 86.31        | 63.66        | 0.9        | 40        |
| 10X        | female+male        | 17.58        | 17.05        | 70.61        | 68.48        | 0.9        | 50        |
| 10X        | female+male        | 17.58        | 26.58        | 56.81        | 85.9         | 0.9        | 60        |
| 10X        | female+male        | 17.58        | 30.15        | 51.6         | 88.5         | 0.9        | 70        |
| 10X        | female+male        | 17.58        | 32.32        | 49.54        | 91.08        | 0.9        | 80        |

|            |                         |              |              |              |              |            |            |
|------------|-------------------------|--------------|--------------|--------------|--------------|------------|------------|
| 10X        | female+male             | 17.58        | 35           | 46.54        | 92.66        | 0.9        | 90         |
| <b>10X</b> | <b>female+male</b>      | <b>17.58</b> | <b>38.37</b> | <b>42.74</b> | <b>93.3</b>  | <b>0.9</b> | <b>100</b> |
| 10X        | best                    | 17.58        | 13.32        | 94.36        | 71.49        | auto       | auto       |
| <b>10X</b> | <b>female_only(YGS)</b> | <b>17.58</b> | <b>7.65</b>  | <b>76.4</b>  | <b>33.24</b> | <b>0.2</b> | <b>n/a</b> |
| <b>10X</b> | <b>female_only(YGS)</b> | <b>17.58</b> | <b>18.57</b> | <b>74.25</b> | <b>78.45</b> | <b>0.4</b> | <b>n/a</b> |
| <b>10X</b> | <b>female_only(YGS)</b> | <b>17.58</b> | <b>26.34</b> | <b>56.41</b> | <b>84.52</b> | <b>0.6</b> | <b>n/a</b> |
| <b>10X</b> | <b>female_only(YGS)</b> | <b>17.58</b> | <b>45.11</b> | <b>35.74</b> | <b>91.71</b> | <b>0.8</b> | <b>n/a</b> |

---

## References

- [1] Li H, Durbin R. 2009. Fast and accurate short read alignment with Burrows–Wheeler transform. *Bioinformatics* 25: 1754–1760.
- [2] Genome In A Bottle FTP site. [ftp://ftp-trace.ncbi.nlm.nih.gov/giab/ftp/data/AshkenazimTrio/HG002\\_NA24385\\_son/NIST\\_Illumina\\_2x250bps/novoalign\\_bams/HG002.GRCh38.2x250.bam](ftp://ftp-trace.ncbi.nlm.nih.gov/giab/ftp/data/AshkenazimTrio/HG002_NA24385_son/NIST_Illumina_2x250bps/novoalign_bams/HG002.GRCh38.2x250.bam). Accessed 18 June 2018.
- [3] Genome In A Bottle FTP site. [ftp://ftp-trace.ncbi.nlm.nih.gov/giab/ftp/data/AshkenazimTrio/analysis/TAMU\\_NIST\\_Illumina\\_2x250bps\\_DISCOVER\\_AR\\_Assemblies\\_09162016/son](ftp://ftp-trace.ncbi.nlm.nih.gov/giab/ftp/data/AshkenazimTrio/analysis/TAMU_NIST_Illumina_2x250bps_DISCOVER_AR_Assemblies_09162016/son). Accessed 18 June 2018.
- [4] Zook, J.M. et al. Extensive sequencing of seven human genomes to characterize benchmark reference materials. *Sci. Data* 3, 160025 (2016).
- [5] Weisenfeld N. et al. 2017. “Direct Determination of Diploid Genome Sequences.” *Genome Research* 27 (5): 757–67.
- [6] Berlin K, et al. 2015. Assembling large genomes with single-molecule sequencing and locality-sensitive hashing. *Nat Biotechnol* 33: 623–630
- [7] Schneider, V.A. et al. Evaluation of GRCh38 and de novo haploid genome assemblies demonstrates the enduring quality of the reference assembly. *Genome Res.* 27, 849–864 (2017).
- [8] Pendleton, M. et al. Assembly and diploid architecture of an individual human genome via single-molecule technologies. *Nat. Methods* 12, 780–786 (2015)
